# Supplementary material for: Structural modeling and molecular dynamics studies on the human LMTK3 domain and the mechanism of ATP binding
Source: Royal Society of Chemistry journal article supplement (doi:10.1039/c4mb00063c), 2014-03-05
Supplement: c4mb00063c1.pdf [file c4mb00063c1.pdf]

Supplementary picture:

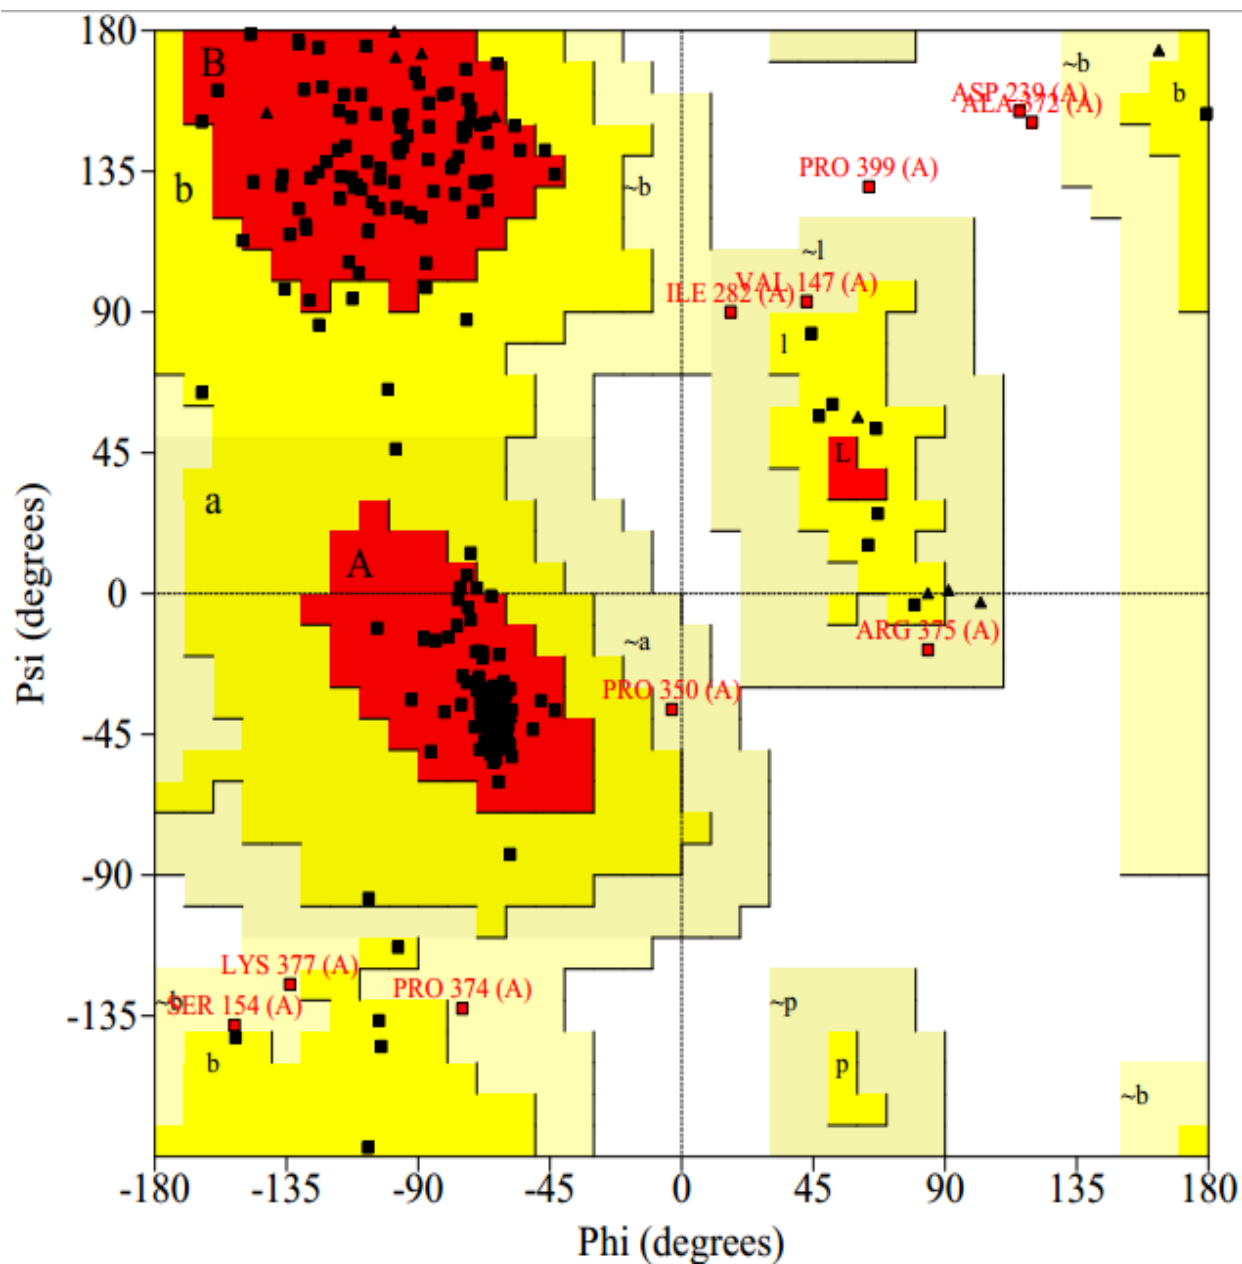

(a)

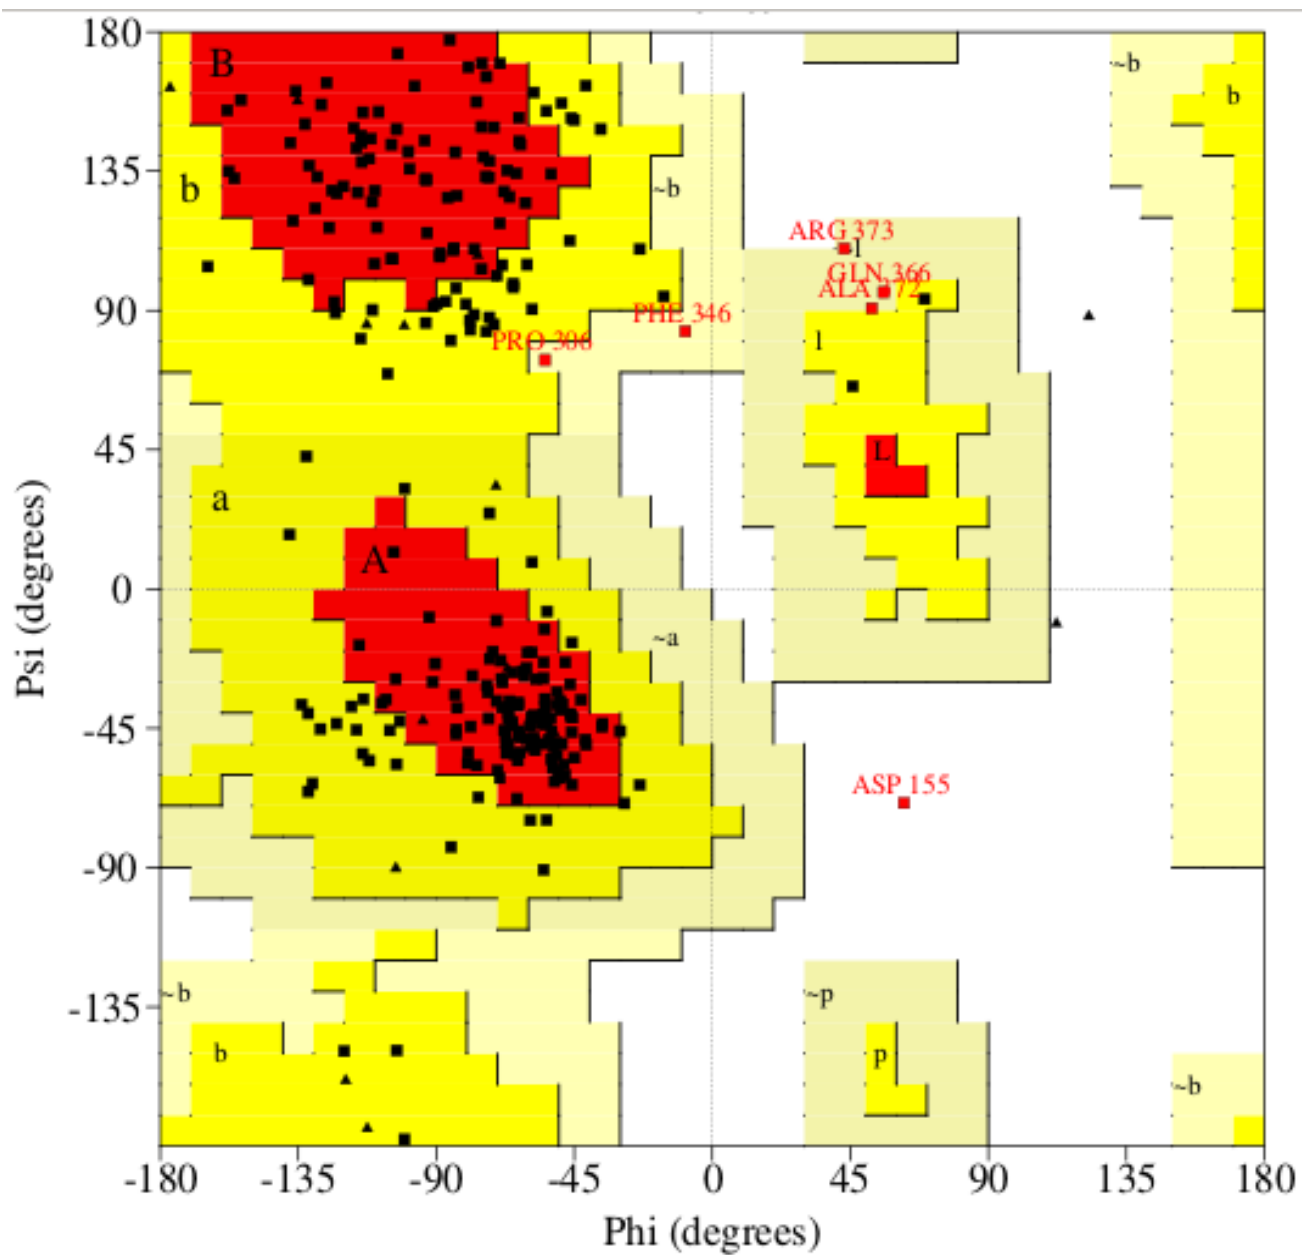

(b)

**Fig. 1.** Validation of Human LMTK3 domain model by Ramachandran plot generated using PROCHECK program (a) before MD simulation (b) after MD simulation.
